# Supplementary material
Source: PubMed Central journal article supplement (PMC5868258)
Supplement: 10.1074_M117.817890_jbc.M117.817890-1.pdf [file 10.1074_M117.817890_jbc.M117.817890-1.pdf]

## Supplemental Information

### The arrestin-1 finger loop interacts with two distinct conformations of active rhodopsin

Matthias Elgeti<sup>[a]†</sup>, Roman Kazmin<sup>[a]</sup>, Alexander S. Rose<sup>[a,b]</sup>, Michal Szczepek<sup>[a]</sup>, Peter W. Hildebrand<sup>[a,b]</sup>, Franz J. Bartl<sup>[a,d]</sup>, Patrick Scheerer<sup>[a,c]</sup> and Klaus Peter Hofmann<sup>[a,d]</sup>

<sup>[a]</sup> Institut für Medizinische Physik und Biophysik (CC2), Charité – Universitätsmedizin Berlin, Charitéplatz 1, 10117 Berlin, Germany. <sup>[b]</sup>AG ProteInformatics, <sup>[c]</sup>AG Protein X-ray Crystallography and Signal Transduction

<sup>[d]</sup> Zentrum für Biophysik und Bioinformatik, Humboldt-Universität zu Berlin, Invalidenstr. 42, 10117 Berlin, German

† present address:  
Matthias Elgeti, Jules Stein Eye Institute and Department of Chemistry and Biochemistry, University of California, Los Angeles, CA 90095, USA

Correspondence should be addressed to M.E.: [melgeti@ucla.edu](mailto:melgeti@ucla.edu)

### *Calculation of peptide binding spectra (PBS)*

Peptide binding spectra (PBS) were determined as following: Firstly, difference spectra in the absence and presence of 20 mM ArrFL peptide were recorded. In a second step the two difference spectra were subtracted (w/ peptide minus w/o peptide) to obtain the PBS. To calculate this double difference spectrum both difference spectra have to be normalized, we chose the 1050-970  $\text{cm}^{-1}$  region where mostly chromophore vibrations absorb. This second step is slightly more difficult for the PBS of the  $\text{R}^*\cdot\text{ArrFL-1}$  complex, since at high pH a significant amount of inactive R (Meta I) is present in the presence and absence of ArrFL-1. To determine the amount of R (Meta I) to be subtracted, we minimized the following difference spectrum:

$$\Delta(\text{w/ ArrFL-1}) - (A*\Delta(\text{w/o ArrFL-1}) + B*\Delta(\text{Meta I}))$$

The pre-factors A and B were determined by a least squares fit in the region 1010-945  $\text{cm}^{-1}$ , where Meta I exhibits a distinct positive band (cf. SI Figure 3).

In case of the R3.50L mutant pigment R (Meta I) correction was unnecessary, as the equilibrium of R and  $\text{R}^*$  states becomes completely pH insensitive (3).

- (1) Sommer, M. E.; Elgeti, M.; Hildebrand, P. W.; Szczepek, M.; Hofmann, K. P.; Scheerer, P. In *Meth Enzymol*; 2015; pp. 563–608.
- (2) Elgeti, M.; Rose, A. S.; Bartl, F. J.; Hildebrand, P. W.; Hofmann, K.-P.; Heck, M. J. *Am. Chem. Soc.* 2013, 135, 12305.
- (3) Vogel, R.; Mahalingam, M.; Lüdeke, S.; Huber, T.; Siebert, F.; Sakmar, T. P. *J. Mol. Biol.* 2008, 380, 648.

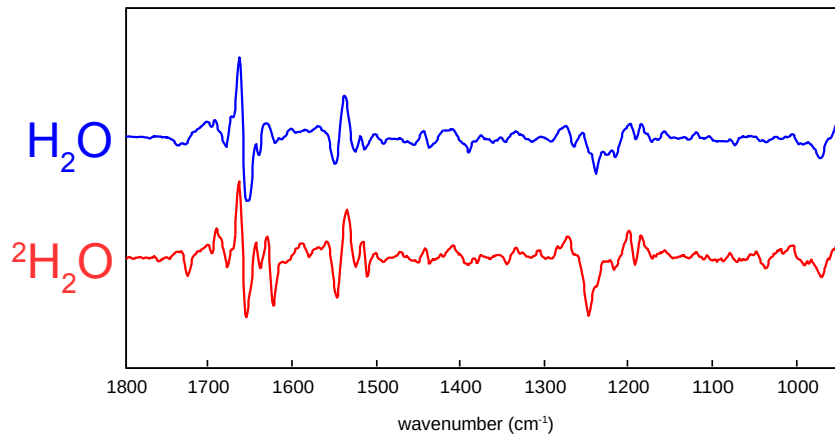

SI Figure 1. Difference spectra of the inactive R (Meta I) conformation stabilized at pH/p<sup>2</sup>H 8.5, -14°C. Even for the spectra in the presence of 20 mM ArrFL-1, residual amounts of (R) were determined by a least-squares fit of the high pH spectrum to a mix of low pH spectrum and the spectrum of inactive (R). This fit was performed in the 1010-945 cm<sup>-1</sup> region, where the inactive (R) conformation exhibits unique features due to specific ligand-protein interactions. The scaled spectra were then subtracted from the high pH (or p<sup>2</sup>H) difference spectra to obtain pure deprotonated R\* difference spectra.

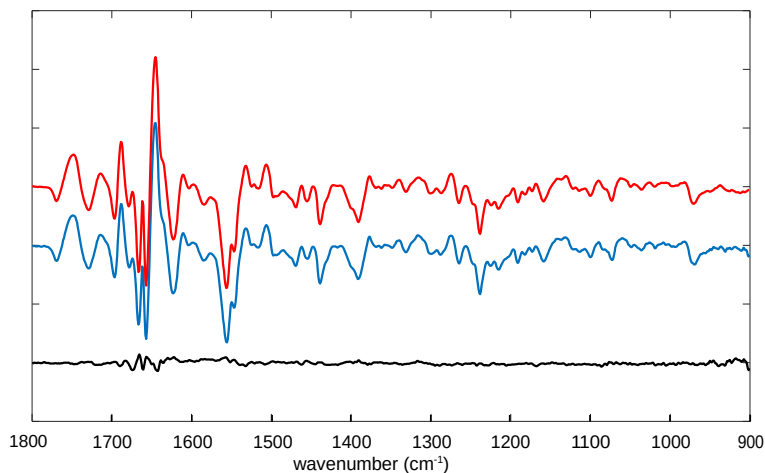

SI Figure 2. Assessment of experimental signal to noise ratio. FTIR difference spectra of WT rhodopsin in egg-PC vesicles, pH 5.5, 30°C (R\*H<sup>+</sup>). Two separately prepared samples. Noise level is best observed in the double difference (black), certain regions exhibit higher noise due to strong absorption (H<sub>2</sub>O or protein, 1700-1600 cm<sup>-1</sup>), inhomogeneous IR source intensity or lower MCT detector sensitivity (below 950 cm<sup>-1</sup>).
